# Supplementary material
Source: Springer Nature journal article supplement (https://www.springermedizin.de/resource/supplementary/13006_2013_174_MOESM1_ESM.pdf/9628174)
Supplement: MOESM1 [file 9628174]

## Primary sample size

N=1865

### Excluded mothers

- Multiple delivery n=6 (0.3%)
- Declined consent n=134 (7.1%)
- Grossly incomplete data n=18 (0.9%)

### Excluded Infants

- Above 6 months n=702 (37.1%)
- Illness prior 2 weeks n=278 (14.7%)
- HIV positive n=12 (0.6%)
- HIV status unknown n=234 (12.4%)
- Congenital abnormality n= 4 (0.2%)
- Low birth weight n=87 (4.6%)
- Prematurity n=15 (0.8%)
- Mother dead n=5 (0.3%)

## Final sample size

n=400 (21.5%)
